# Supplementary material
Source: PubMed Central journal article supplement (PMC4096303)
Supplement: NIHMS585614-supplement-SI.pdf [file NIHMS585614-supplement-SI.pdf]

**Supporting Information**  
**for**  
**Rational Design of a Structural Framework**  
**with Potential Use to Develop Chemical Reagents That**  
**Target and Modulate Multiple Facets of Alzheimer's Disease**

Sanghyun Lee,<sup>1,ξ</sup> Xueyun Zheng,<sup>2</sup> Janarthanan Krishnamoorthy,<sup>3,4</sup> Masha G. Savelieff,<sup>1</sup> Hyun Min Park,<sup>1,5</sup> Jeffrey R. Brender,<sup>3,4</sup> Jin Hoon Kim,<sup>1,5</sup> Jeffrey S. Derrick,<sup>4</sup> Akiko Kochi,<sup>4</sup> Hyuck Jin Lee,<sup>4</sup> Cheal Kim,<sup>5</sup> Ayyalusamy Ramamoorthy,<sup>3,4,\*</sup> Michael T. Bowers,<sup>2,\*</sup> and Mi Hee Lim<sup>1,4,6,\*</sup>

<sup>1</sup> Life Sciences Institute, University of Michigan, Ann Arbor, Michigan 48109-2216, USA

<sup>2</sup> Department of Chemistry and Biochemistry, University of California, Santa Barbara, California 93106-9510, USA

<sup>3</sup> Biophysics, University of Michigan, Ann Arbor, Michigan 48109-1055, USA

<sup>4</sup> Department of Chemistry, University of Michigan, Ann Arbor, Michigan 48109-1055, USA

<sup>5</sup> Department of Chemistry, Seoul National University of Science and Technology, Seoul 139-743, Korea

<sup>6</sup> School of Nano-Bioscience and Chemical Engineering, Ulsan National Institute of Science and Technology (UNIST), Ulsan 689-798, Korea

<sup>ξ</sup> Present address: Department of Molecular and Cellular Biology, University of Guelph, Guelph, Ontario N1G 2W1, Canada

\* To whom correspondence should be addressed: [ramamoor@umich.edu](mailto:ramamoor@umich.edu), [bowers@chem.ucsb.edu](mailto:bowers@chem.ucsb.edu), and [mhlim@unist.ac.kr](mailto:mhlim@unist.ac.kr)

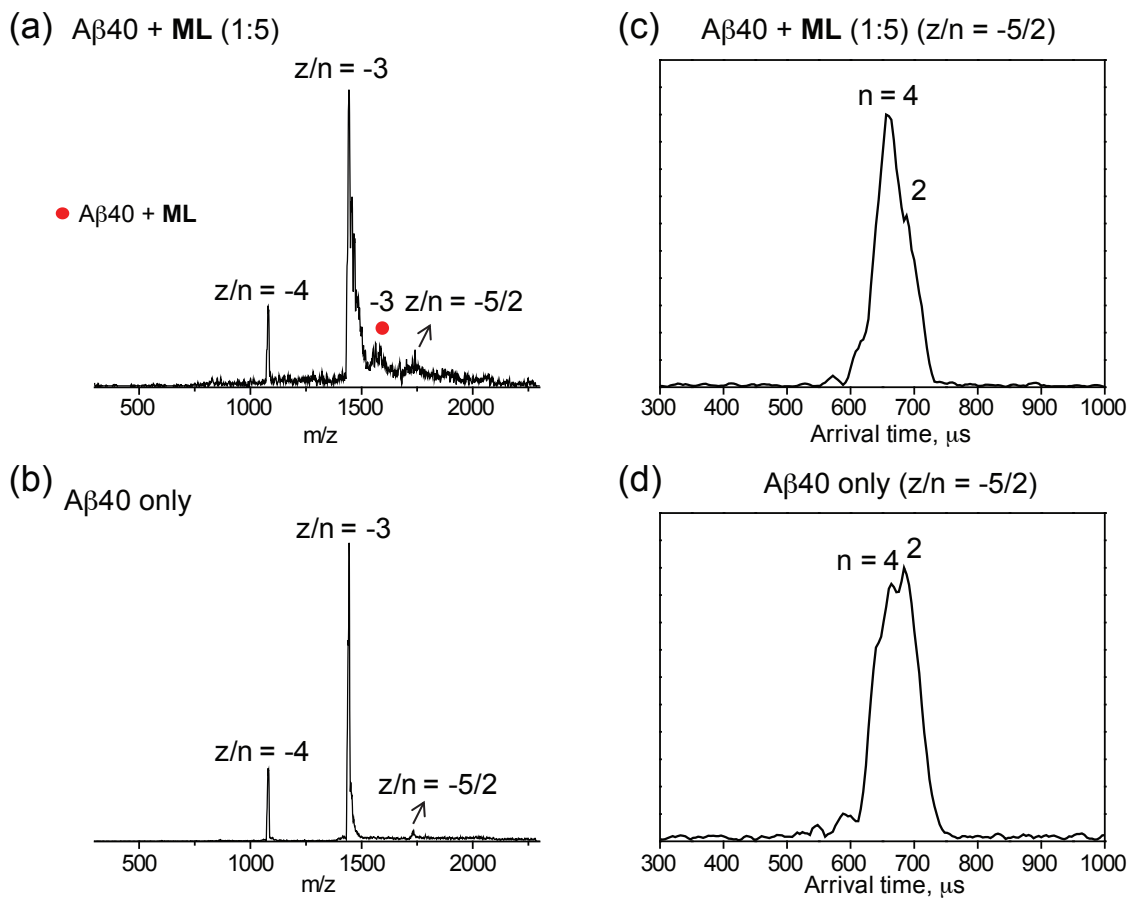

**Figure S1.** Interaction and effect of **ML** on  $A\beta_{40}$  ( $A\beta:\mathbf{ML} = 1:5$ ). (a and b) Mass spectra of  $A\beta_{40}$  with and without **ML**, where  $z/n$  is charge/oligomer ratio. (c and d) The ATD of  $-5/2$   $A\beta_{40}$  in the presence and absence of **ML**. Oligomer number ( $n$ ) is noted for each feature.

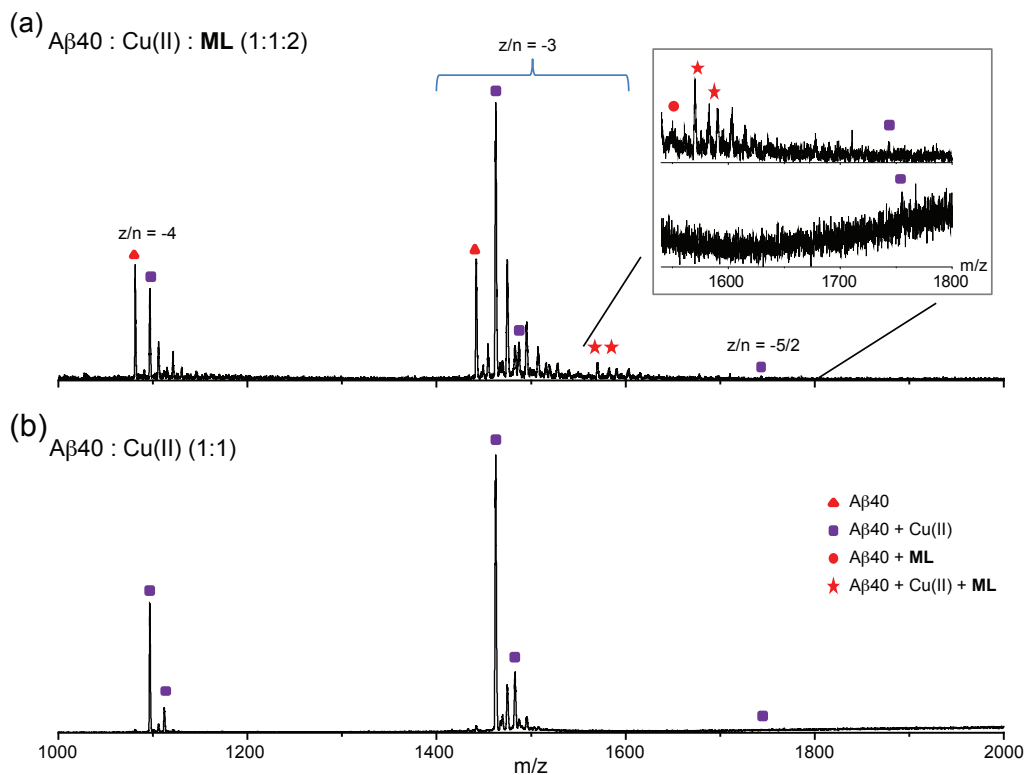

**Figure S2.** Mass spectra of samples containing  $A\beta_{40}$  and  $Cu(II)$  in the absence and presence of **ML**. (a and b) Mass spectra of a mixture of  $A\beta_{40}:Cu(II):ML (1:1:2)$  and  $A\beta_{40}:Cu(II) (1:1)$ . The peaks for  $A\beta_{40}$ ,  $Cu(II)$ -bound  $A\beta_{40}$ , **ML**-bound  $A\beta_{40}$ , and complexes of  $A\beta_{40}$ ,  $Cu(II)$ , and **ML** are labeled according to the legend.

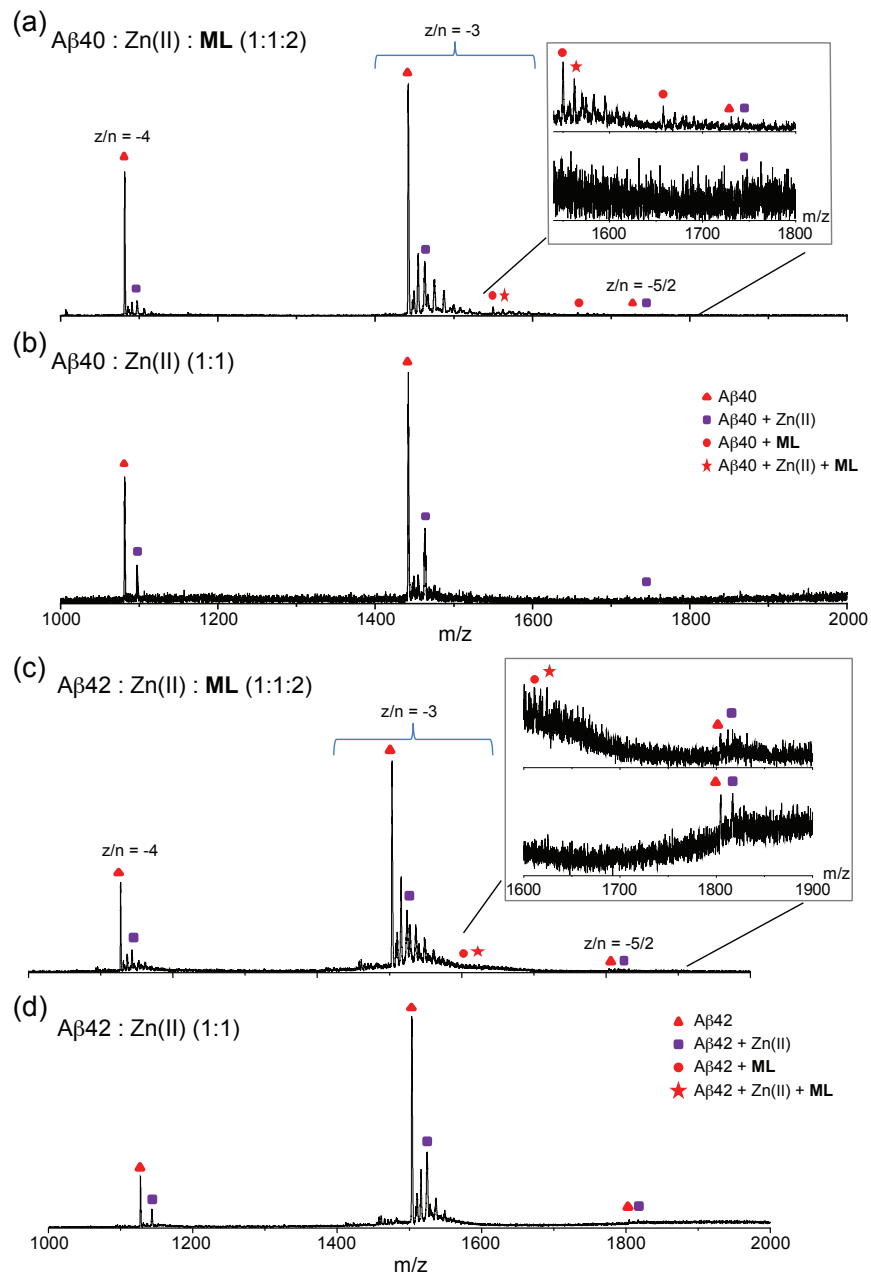

**Figure S3.** Mass spectra of Zn(II)–A $\beta$ 40/42 samples with and without ML. Mass spectra of a mixture of A $\beta$ 40/42:Zn(II):ML (1:1:2, a and c) and A $\beta$ 40/42:Zn(II) (1:1, b and d). The peaks for A $\beta$ 40/42, Zn(II)-bound A $\beta$ 40/42, ML-bound A $\beta$ 40/42, and complexes of A $\beta$ 40/42, Zn(II), and ML are labeled according to the legend.

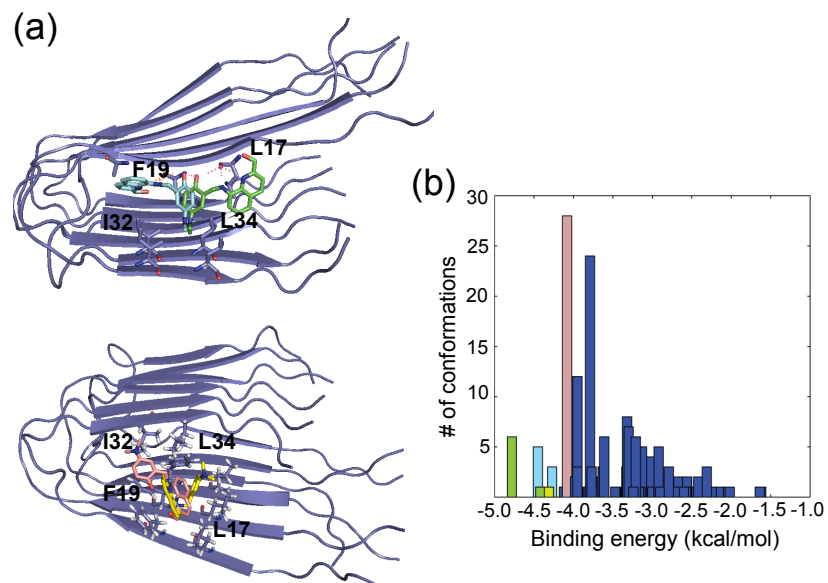

**Figure S4.** Docking of **ML** to negatively staggered A $\beta$ 40 fibers (PDB 2LMO). (a) Lowest four energy conformations of **ML** to A $\beta$ 40 fibers. (b) Cluster energy analysis of **ML** binding to A $\beta$ 40 fibers. The lowest six energy conformations are color-coded to match the conformations shown in (a). Matching colors indicate conformations closely related by symmetry.

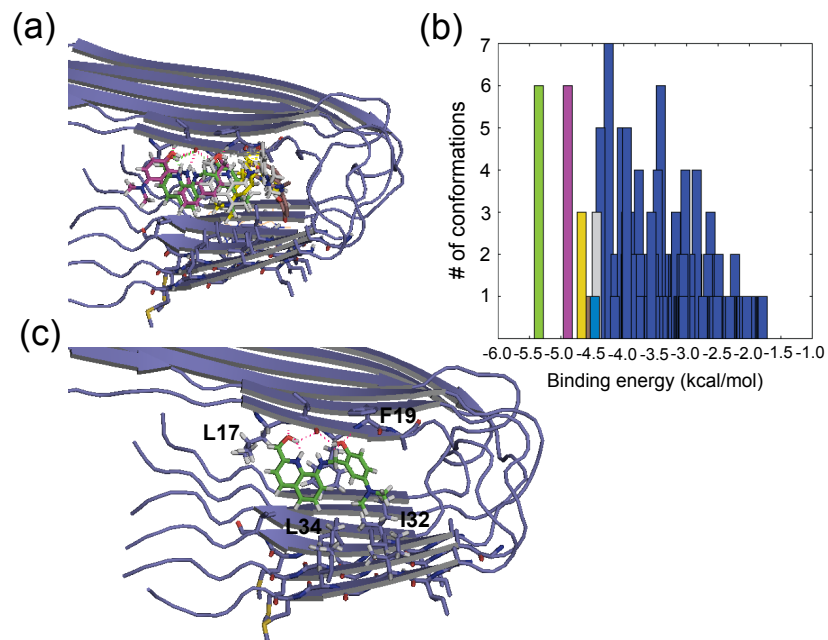

**Figure S5.** Docking of **ML** to positively staggered A $\beta$ 40 fibers (PDB 2LMN). (a) Lowest six energy conformations of **ML** to A $\beta$ 40 fibers. (b) Cluster energy analysis of **ML** binding to A $\beta$ 40 fibers. The lowest six energy conformations are color-coded to match the structures shown in (a). (c) A close-up of the lowest energy docked conformation.

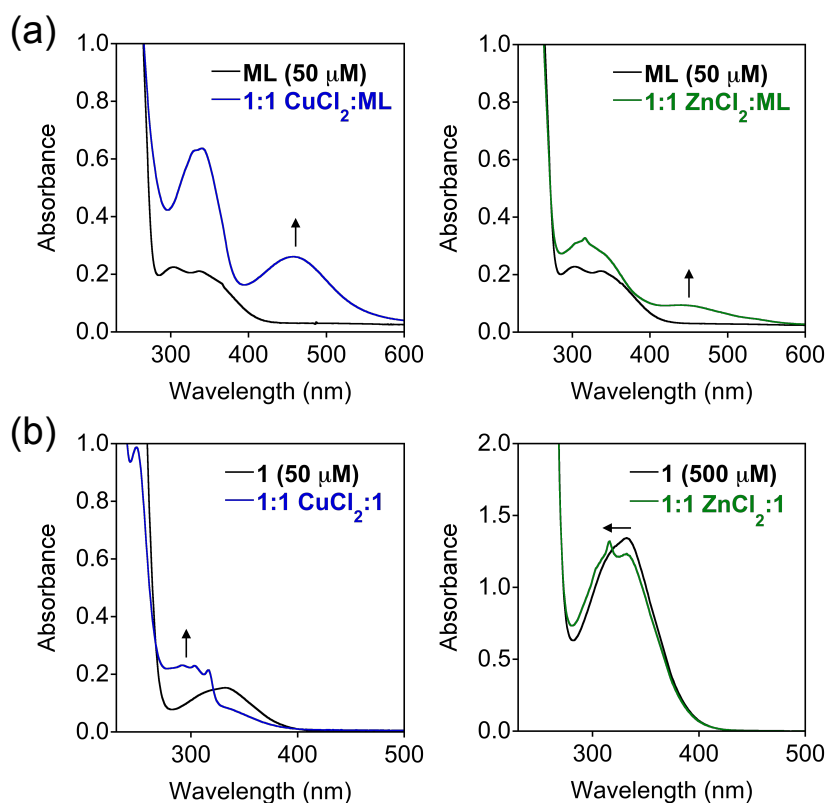

**Figure S6.** Metal binding studies of **ML** and **1**. (a) UV-Vis spectra of **ML** (black line) and with CuCl<sub>2</sub> (left, blue line; 30 min incubation) or ZnCl<sub>2</sub> (right, green line; 60 min incubation). (b) UV-Vis spectra of **1** (black line) with CuCl<sub>2</sub> (left, blue line; 10 min incubation) or ZnCl<sub>2</sub> (right, green line; 10 min incubation). Note that the scale on **1**:ZnCl<sub>2</sub> is different to other spectra. Experimental conditions: [M(II)]:[L] = 1:1; 20 mM HEPES, pH 7.4, 150 mM NaCl; room temperature.

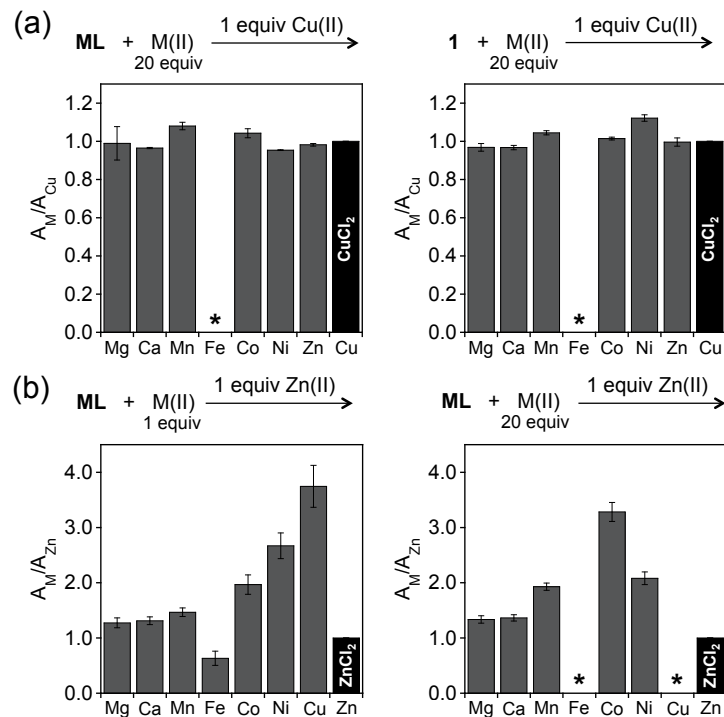

**Figure S7.** (a) Metal selectivity studies of **ML** and **1** for Cu(II) over other divalent metal ions. Gray bars represent the subsequent addition of CuCl<sub>2</sub> (50 μM) to solutions of the ligand with 20 equivalents of other divalent metal ions (MgCl<sub>2</sub>, CaCl<sub>2</sub>, MnCl<sub>2</sub>, FeCl<sub>2</sub>, CoCl<sub>2</sub>, NiCl<sub>2</sub>, and ZnCl<sub>2</sub>). The absorbance of **ML** and **1** at 485 nm at 291 nm, respectively, was used to calculate  $A_M/A_{\text{Cu}}$ . (b) Metal selectivity studies of **ML** for Zn(II) over other divalent metal ions. Gray bars represent the subsequent addition of ZnCl<sub>2</sub> (50 μM) to solutions of ligand with other divalent metal ions. The absorbance of **ML** at 425 nm was used to calculate  $A_M/A_{\text{Zn}}$ . Noticeable  $A_M$  values at 425 nm were observed upon incubation of some divalent metal ions with **ML**, resulting in  $A_M/A_{\text{Zn}} > 1$ , although Zn(II) is relatively selective over other divalent metal ions (*i.e.*, Mg(II), Ca(II), and Mn(II)). Experimental conditions: [MCl<sub>2</sub>] = 50 μM or 1 mM, [CuCl<sub>2</sub> or ZnCl<sub>2</sub>] = 50 μM; 20 mM HEPES, pH 7.4, 150 mM NaCl; 5 or 15 min incubation; room temperature. Due to the limited spectral change, Zn(II) selectivity of **1** was not performed. \* Indicates precipitation in the reaction.



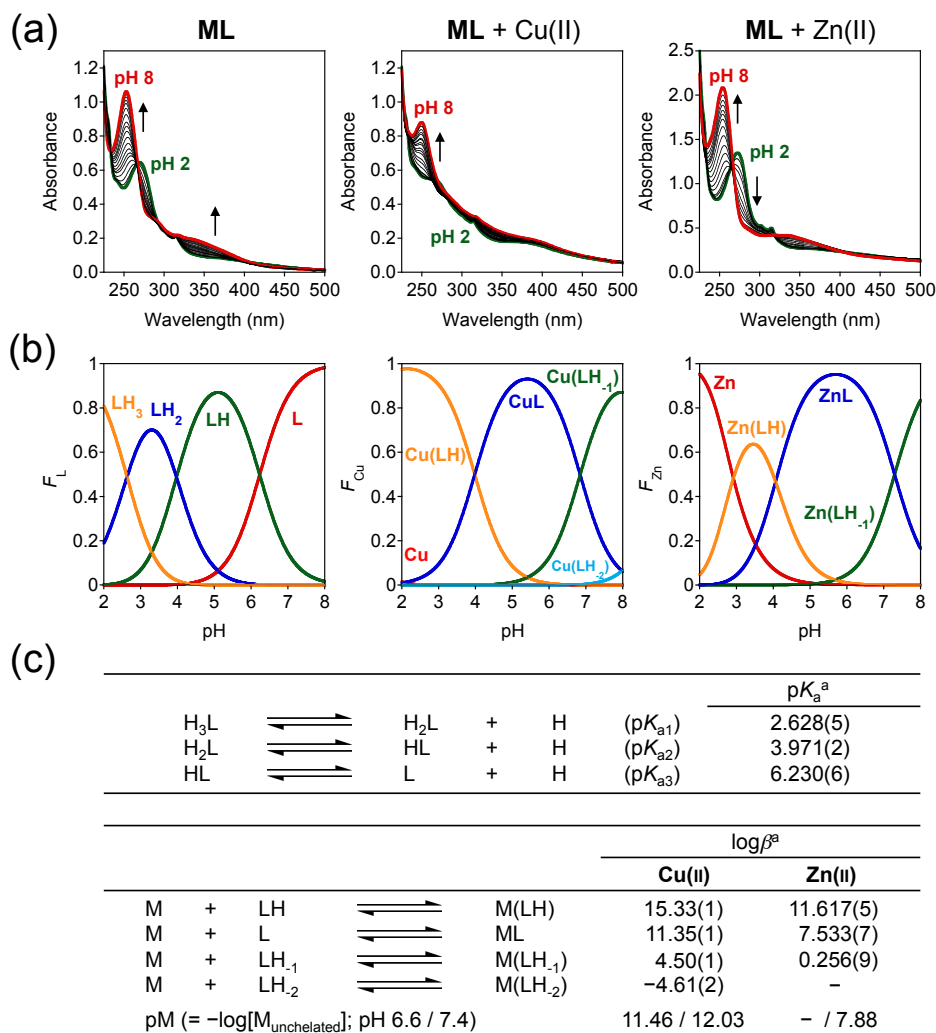

**Figure S8.** Solution speciation studies of **ML** with and without Cu(II) or Zn(II). (a) UV-Vis variable-pH titration spectra of **ML** in the absence (left) and presence of Cu(II) (middle) or Zn(II) (right). Note that the y scale on **ML** + Zn(II) is different to other spectra. (b) Solution speciation diagrams ( $F_L$  = fraction of compound with given protonation). (c) Summary of acidity constants ( $pK_a$ ) of **ML** (top) and stability constants ( $\log\beta$ ) of Cu(II)–**ML** or Zn(II)–**ML** complexes (bottom). Charges are omitted for clarity. <sup>a</sup> The error of the last digit is shown in parentheses. Experimental conditions: [**ML**] = 50  $\mu$ M (for metal-free); [M(II)]:[**ML**] = 1:2, [Cu(II)] = 25  $\mu$ M (incubation with **ML** for 1 h), [Zn(II)] = 50  $\mu$ M (incubation with **ML** for 2 h); pH 2.0-8.0;  $I$  = 0.10 M NaCl; room temperature.

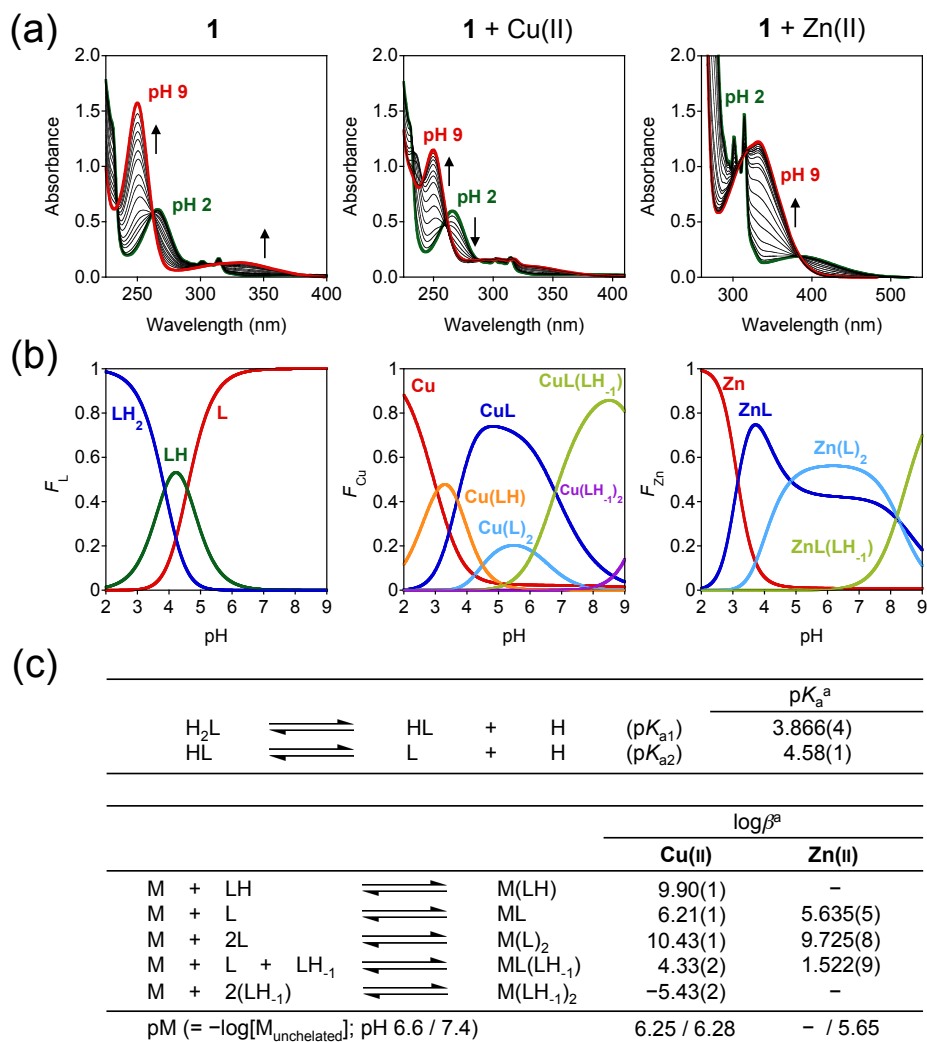

**Figure S9.** Solution speciation studies of **1** with and without Cu(II) or Zn(II). (a) UV-Vis variable-pH titration spectra of **1** in the absence (left) and presence of Cu(II) (middle) or Zn(II) (right). (b) Solution speciation diagrams ( $F_L$  = fraction of compound with given protonation). (c) Summary of acidity constants ( $pK_a$ ) (top) and stability constants ( $\log\beta$ ) of **1** with Cu(II) and Zn(II) (bottom). Charges are omitted for clarity. <sup>a</sup> The error of the last digit is shown in parentheses. Experimental conditions:  $[1] = 50 \mu\text{M}$  (for metal-free);  $[M(\text{II})]:[1] = 1:2$ ,  $[\text{Cu}(\text{II})] = 25 \mu\text{M}$  (incubation with **1** for 1 h),  $[\text{Zn}(\text{II})] = 250 \mu\text{M}$  (incubation with **1** for 2 h); pH 2.0-9.0;  $I = 0.10 \text{ M NaCl}$ ; room temperature.

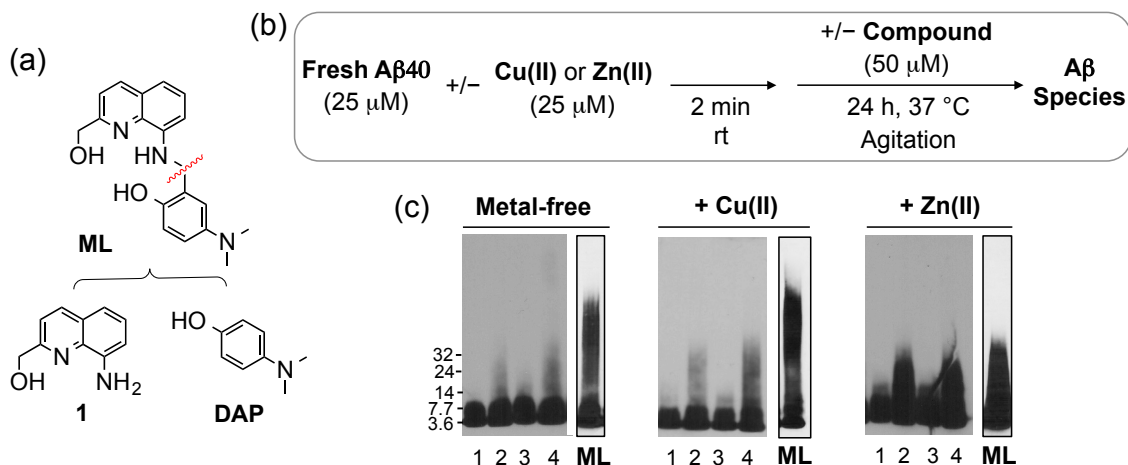

**Figure S10.** Influence of **1**, **DAP**, or **ML** on the formation of metal-free and metal-induced A $\beta$ 40 aggregates. (a) Chemical structures of **1**, **DAP**, and **ML**. (b) Scheme of the inhibition experiment. (c) A $\beta$  species were visualized by gel electrophoresis using immunoblotting with an anti-A $\beta$  antibody (6E10). Experimental conditions: A $\beta$  (25  $\mu$ M); CuCl<sub>2</sub> or ZnCl<sub>2</sub> (25  $\mu$ M); compound (50  $\mu$ M); 24 h; pH 6.6 (for Cu(II) experiments) or 7.4 (for metal-free and Zn(II) experiments); 37 °C; constant agitation. Lanes: (1) A $\beta$   $\pm$  CuCl<sub>2</sub> or ZnCl<sub>2</sub>; (2) A $\beta$   $\pm$  CuCl<sub>2</sub> or ZnCl<sub>2</sub> + **DAP**; (3) A $\beta$   $\pm$  CuCl<sub>2</sub> or ZnCl<sub>2</sub> + **1**; (4) A $\beta$   $\pm$  CuCl<sub>2</sub> or ZnCl<sub>2</sub> + (**DAP** + **1**).

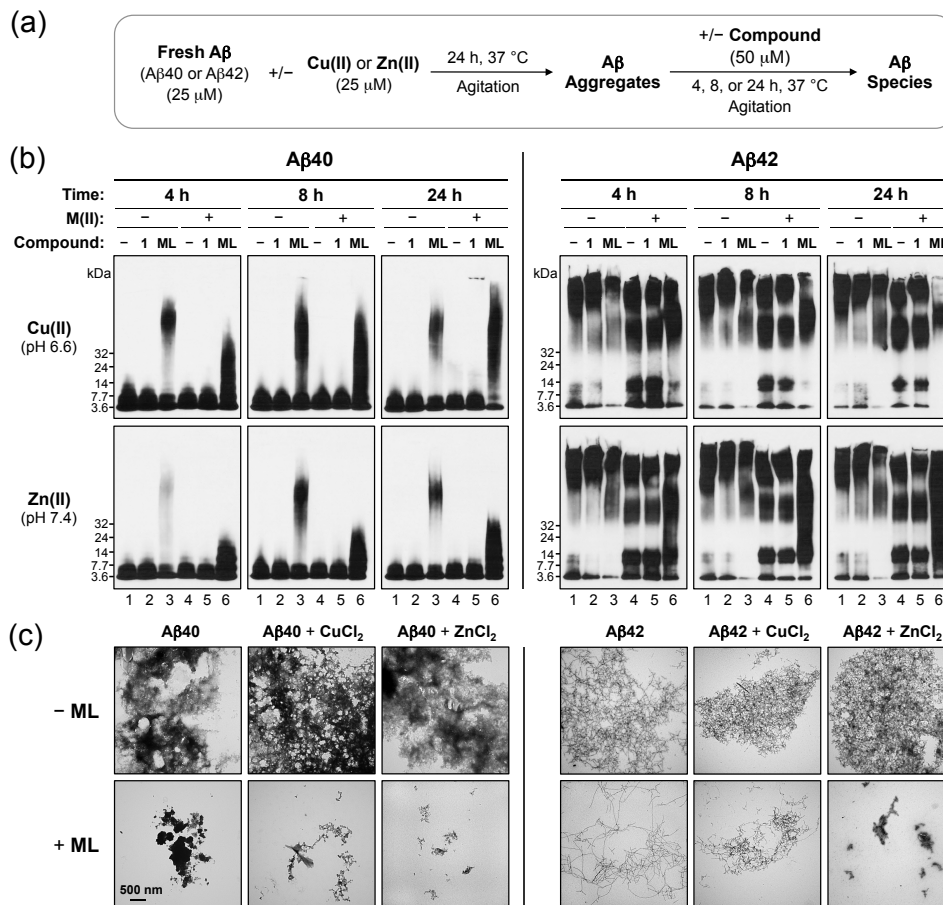

**Figure S11.** Transformation of preformed metal-free and metal-induced A $\beta$ 40/42 aggregates in the presence of **ML** or **1**. (a) Scheme of the disaggregation experiment. (b) A $\beta$  species were visualized by gel electrophoresis using immunoblotting with an anti-A $\beta$  antibody (6E10). A $\beta$  aggregates were produced by incubation of A $\beta$  (25  $\mu$ M) with/without CuCl<sub>2</sub> or ZnCl<sub>2</sub> (25  $\mu$ M) in 150  $\mu$ M NaCl and 20  $\mu$ M HEPES, pH 6.6 (for Cu(II) experiment) or pH 7.4 (for metal-free and Zn(II) experiments) at 37 °C with constant agitation for 24 h. **ML** or **1** (50  $\mu$ M) was then added to each sample and the resulting solutions were incubated an additional 4, 8, or 24 h. Lanes: (1) A $\beta$ ; (2) A $\beta$  + **1**; (3) A $\beta$  + **ML**; (4) A $\beta$  + [CuCl<sub>2</sub> or ZnCl<sub>2</sub>]; (5) A $\beta$  + [CuCl<sub>2</sub> or ZnCl<sub>2</sub>] + **1**; (6) A $\beta$  + [CuCl<sub>2</sub> or ZnCl<sub>2</sub>] + **ML**. (c) TEM images from (b) samples following 24 h incubation.

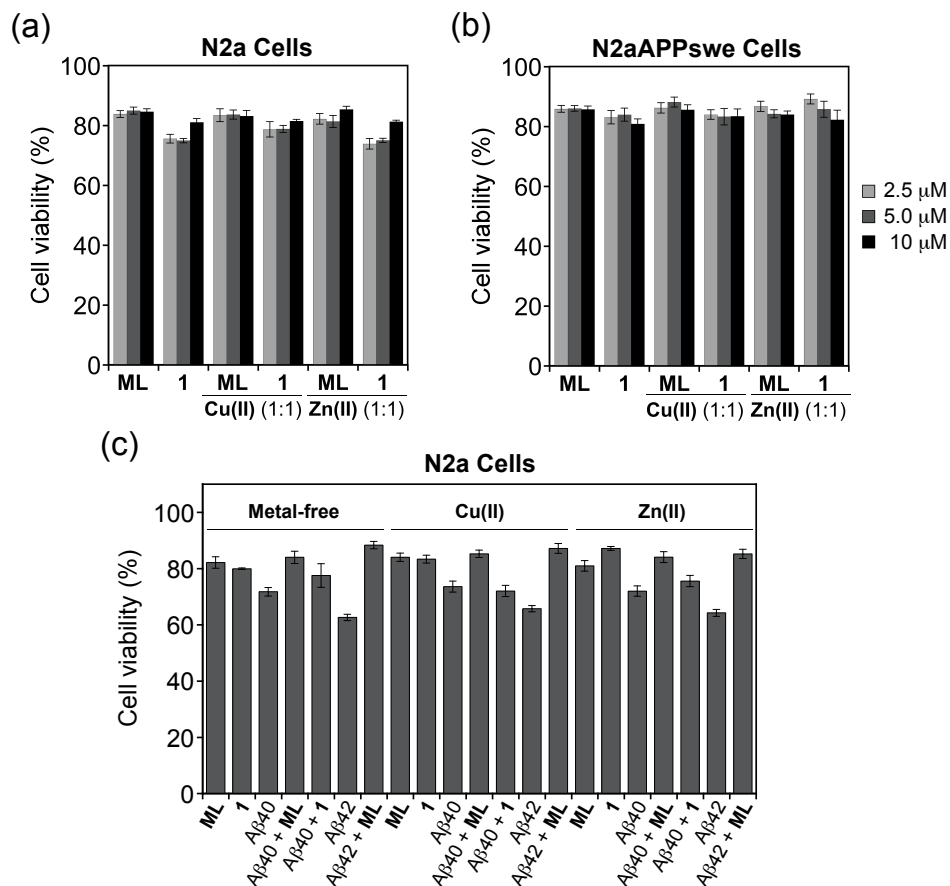

**Figure S12.** (a and b) Cytotoxicity study of **ML** or **1** in the absence and presence of Cu(II) or Zn(II) and (c) their modulation of toxicity caused by metal-free and metal-treated Aβ species in living cells. Cytotoxicity of **ML** or **1** in (a) murine Neuro-2a (N2a) neuroblastoma cells and (b) N2a cells overexpressing the Swedish mutant human amyloid precursor proteins (APP) (N2aAPPswe). Cells were treated with various concentrations of **ML** or **1** with/without a metal chloride salt (CuCl<sub>2</sub> or ZnCl<sub>2</sub>) for 24 h at 37 °C. (c) The effect of **ML** or **1** on metal-free and metal-treated Aβ species in N2a cells. Cells treated with Aβ40 or Aβ42 (10 μM), a metal chloride salt (CuCl<sub>2</sub> or ZnCl<sub>2</sub>; 10 μM), with/without **ML** or **1** (10 μM) were incubated for 24 h at 37 °C. Cell viability was determined by the MTT assay and the values of viability (%) were calculated compared to cells treated with DMSO only (0-1%, v/v). Data are mean ± S.E.M.  $P < 0.05$ ,  $n = 3$ .

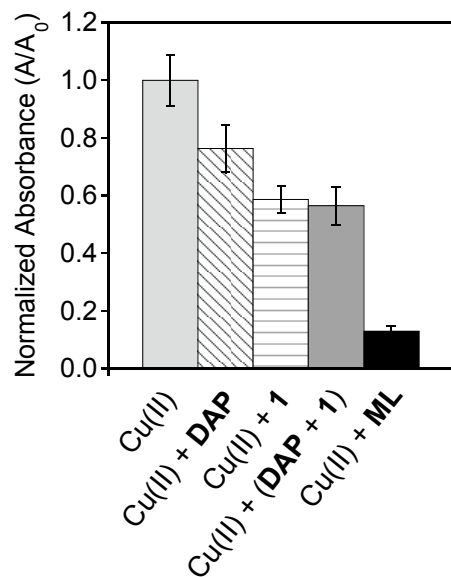

**Figure S13.** Inhibitory activity of **DAP**, **1**, and a mixture of **DAP** and **1** (**DAP + 1**), relative to **ML**, toward ROS formation, determined by the 2-deoxyribose assay. The absorbance values are normalized compared to ligand-free condition ( $\text{CuCl}_2/\text{compound} = 10/125 \mu\text{M}$ ). The conditions and methods are described in the Experimental Section.
